# Supplementary material for: Synthesis of functionalized 1,4-dihydropyridines containing benzosultams catalyzed by lipase
Source: Royal Society of Chemistry journal article supplement (doi:10.1039/d2nj06028k), 2023-01-01
Supplement: d2nj06028k1.pdf [file d2nj06028k1.pdf]

*Support information for*

## **Synthesis of functionalized 1,4-Dihydropyridines containing benzosultams catalyzed by lipase**

Yuelin Xu,<sup>[a]</sup> Fengxi Li,<sup>[a]</sup> Yong Tang,<sup>[a]</sup> Junhao Wu,<sup>[a]</sup> Chunyu Wang,<sup>[c]</sup> Chuang Du,<sup>[b]\*</sup> Zhi Wang,<sup>[a]\*</sup> Lei Wang<sup>[a]\*</sup>.

[a] Key Laboratory of Molecular Enzymology and Engineering of Ministry of Education, School of Life Sciences, Jilin University, Changchun, 130023 (P. R. China)

[b] Changchun Institute of Applied Chemistry, Chinese Academy of Sciences, No. 5625 Renmin Rd., Changchun, Jilin 130022, China

[c] State Key Laboratory of Supramolecular Structure and Materials, Jilin University, Changchun, 130023 (P. R. China)

**\*Corresponding author:**

E-mail: [duch@ciac.ac.cn](mailto:duch@ciac.ac.cn); [wangzhi@jlu.edu.cn](mailto:wangzhi@jlu.edu.cn); [w\\_lei@jlu.edu.cn](mailto:w_lei@jlu.edu.cn)

## Materials and Methods

### *General Information.*

PPL (porcine pancreas lipase, 5600 U/g), PSL (*Pseudomonas sp.* lipase, 8500U/g), CalB (Lipase B from *Candida antarctica*, 10,000U/mL), CSL (*Candida sp.* lipase, 6400U/g) was purchased from Shanghai Yuan Ye Biological Technology Company and MML (*Mucor miehei lipase*, 7300 U/g), were purchased from Sigma-Aldrich China Co. (Beijing, China). One unit of the enzyme activity was defined as the amount of enzyme required to hydrolyze 1  $\mu$ mol of p-nitrophenyl acetate per minute at 30 °C. All the other chemical reagents were purchased from commercial suppliers (Bide Pharmatech, Aladdin, Energy Chemical). All the commercially available reagents and solvents were used without further purification. Proton nuclear magnetic resonance (<sup>1</sup>H NMR) spectra were recorded on a 400 MHz spectrometer in CDCl<sub>3</sub> or DMSO. Chemical shifts for protons are reported in parts per million downfield from tetramethyl silane (TMS) and are referenced to residual protium in the NMR solvent (CHCl<sub>3</sub> =  $\delta$  7.26 ppm, DMSO =  $\delta$  2.50 ppm). NMR data are presented as follows: chemical shift ( $\delta$  ppm), multiplicity (s = singlet, d = doublet, t = triplet, q = quartet, m = multiplet, br = broad), coupling constant in Hertz (Hz), integration. HRMS was determined on a Q-TOF Micro LC/MS System ESI spectrometer. The experiments were performed triplicate, and all data were obtained based on the average values.

### *General Procedure for the synthesis of 4.*

To a stirred solution of **1** (0.3 mmol), **2** (0.4 mmol) and **4** (0.4 mmol) in water (1.0 mL) at 40 °C, was added PPL (200 U) in one portion and stirred for 36h or 48h. The progress of the reaction was monitored by TLC. The reaction mixture was then concentrated in vacuo and purified by flash column chromatography (acetone/DCM = 1/50-1/20) on silica gel to give products **4**.

### *General Procedure for the synthesis of 6.*

To a stirred solution of **1** (0.3 mmol) and **5** (0.3 mmol) in water (1.0 mL) at 40 °C, was added PPL (200 U) in one portion and stirred for 36h or 48h. The progress of the reaction was monitored by TLC. The reaction mixture was then concentrated in vacuo and purified by flash column chromatography (acetone/DCM = 1/50-1/20) on silica gel to give products **6**.

## Data of Products

For known compounds, spectral data are identical to literature.<sup>1</sup>

### **4a**

<sup>1</sup>H NMR (400 MHz, DMSO)  $\delta$  10.75 (s, 1H), 8.21 (d,  $J$  = 7.9 Hz, 1H), 8.12 (d,  $J$  = 7.9 Hz, 1H), 7.93 – 7.85 (m, 1H), 7.84 – 7.77 (m, 1H), 7.36 – 7.19 (m, 1H), 7.07 (dd,  $J$  = 7.6, 1.0 Hz, 1H), 6.95 (d,  $J$  = 7.7 Hz, 1H), 6.56 (s, 2H), 6.16 (s, 1H). **ESI HRMS**: calcd. For C<sub>19</sub>H<sub>12</sub>N<sub>4</sub>O<sub>3</sub>S[M+H]<sup>+</sup> 377.0693, found 377.0697.

### **4b**

<sup>1</sup>H NMR (400 MHz, DMSO)  $\delta$  11.01 (s, 1H), 8.22 (d,  $J$  = 7.9 Hz, 1H), 8.11 (d,  $J$  = 7.9 Hz, 1H), 7.91 (td,  $J$  = 7.7, 1.2 Hz, 1H), 7.86 – 7.77 (m, 1H), 7.34 (t,  $J$  = 8.0 Hz, 1H), 7.09 – 7.03 (m, 1H), 6.93 (d,  $J$  = 7.8 Hz, 1H), 6.62 (s, 2H), 6.17 (s, 1H). <sup>13</sup>C NMR (101 MHz, DMSO-*D*<sub>6</sub>)  $\delta$  177.20, 149.46, 143.55, 135.59, 132.41, 131.75, 131.62, 131.14, 130.09, 128.85, 126.73, 123.56, 121.92, 118.06, 109.65, 100.58, 59.29,

52.18. **ESI HRMS:** calcd. For  $C_{19}H_{11}N_4O_3SCl[M+H]^+$  411.0323 and 413.0294, found 411.0322 and 413.0291.

#### 4c

$^1H$  NMR (400 MHz, DMSO)  $\delta$  10.88 (s, 1H), 8.22 (d,  $J = 7.9$  Hz, 1H), 8.10 (d,  $J = 7.9$  Hz, 1H), 7.90 (td,  $J = 7.6, 1.2$  Hz, 1H), 7.85 – 7.77 (m, 1H), 7.39 – 7.33 (m, 2H), 7.02 – 6.93 (m, 1H), 6.63 (s, 2H), 6.16 (s, 1H). **ESI HRMS:** calcd. For  $C_{19}H_{11}N_4O_3SCl[M+H]^+$  411.0303 and 413.0274, found 411.0302 and 413.0271.

#### 4d

$^1H$  NMR (400 MHz, DMSO)  $\delta$  10.88 (s, 1H), 8.23 (d,  $J = 7.9$  Hz, 1H), 8.11 (d,  $J = 7.9$  Hz, 1H), 7.95 – 7.87 (m, 1H), 7.85 – 7.79 (m, 1H), 7.53 – 7.45 (m, 2H), 6.91 (d,  $J = 8.2$  Hz, 1H), 6.62 (s, 2H), 6.16 (s, 1H). **ESI HRMS:** calcd. For  $C_{19}H_{11}N_4O_3SBr[M+H]^+$  454.9808 and 456.9788, found 454.9808 and 456.9776.

#### 4e

$^1H$  NMR (400 MHz, DMSO)  $\delta$  10.64 (s, 1H), 8.21 (d,  $J = 7.9$  Hz, 1H), 8.13 (d,  $J = 7.9$  Hz, 1H), 7.89 (td,  $J = 7.7, 1.1$  Hz, 1H), 7.84 – 7.76 (m, 1H), 7.14 – 7.03 (m, 2H), 6.83 (d,  $J = 7.8$  Hz, 1H), 6.53 (s, 2H), 6.14 (s, 1H), 2.27 (s, 3H). **ESI HRMS:** calcd. For  $C_{20}H_{14}N_4O_3S[M+H]^+$  391.0859, found 391.0860.

#### 4f

$^1H$  NMR (400 MHz, DMSO)  $\delta$  10.91 (s, 1H), 8.22 (d,  $J = 7.9$  Hz, 1H), 8.11 (d,  $J = 7.9$  Hz, 1H), 7.90 (td,  $J = 7.7, 1.2$  Hz, 1H), 7.81 (t,  $J = 7.6$  Hz, 1H), 7.28 (dd,  $J = 8.3, 5.5$  Hz, 1H), 6.86 (ddd,  $J = 10.1, 8.2, 2.4$  Hz, 1H), 6.78 (dd,  $J = 9.1, 2.4$  Hz, 1H), 6.59 (s, 2H), 6.16 (s, 1H). **ESI HRMS:** calcd. For  $C_{19}H_{11}N_4O_3SF[M+H]^+$  395.0609, found 395.0607.

#### 4g

$^1H$  NMR (400 MHz, DMSO)  $\delta$  10.91 (s, 1H), 8.22 (d,  $J = 7.9$  Hz, 1H), 8.09 (d,  $J = 7.9$  Hz, 1H), 7.90 (td,  $J = 7.7, 1.2$  Hz, 1H), 7.85 – 7.76 (m, 1H), 7.27 (d,  $J = 8.0$  Hz, 1H), 7.11 (dd,  $J = 8.0, 1.9$  Hz, 1H), 6.97 (d,  $J = 1.9$  Hz, 1H), 6.63 (s, 2H), 6.16 (s, 1H). **ESI HRMS:** calcd. For  $C_{19}H_{11}N_4O_3SCl[M+H]^+$  411.0313 and 413.0284, found 411.0312 and 413.0281.

#### 4h

$^1H$  NMR (400 MHz, DMSO)  $\delta$  10.75 (s, 1H), 8.21 (d,  $J = 7.9$  Hz, 1H), 8.12 (d,  $J = 7.9$  Hz, 1H), 7.93 – 7.85 (m, 1H), 7.83 – 7.76 (m, 1H), 7.50 (d,  $J = 7.2$  Hz, 1H), 7.23 (d,  $J = 7.4$  Hz, 1H), 7.06 (td,  $J = 7.6, 1.0$  Hz, 1H), 6.56 (s, 2H), 6.16 (s, 1H). **ESI HRMS:** calcd. For  $C_{19}H_{11}N_4O_3SBr[M+H]^+$  454.9808 and 456.9788, found 454.9808 and 456.9776.

#### 4i

$^1H$  NMR (400 MHz, DMSO)  $\delta$  10.70 (s, 1H), 8.22 (d,  $J = 7.9$  Hz, 1H), 8.12 (d,  $J = 7.9$  Hz, 1H), 7.92 – 7.87 (m, 1H), 7.80 (t,  $J = 7.6$  Hz, 1H), 6.93 (s, 1H), 6.86 (s, 1H), 6.51 (s, 2H), 6.14 (s, 1H), 2.24 (s, 6H).  $^{13}C$  NMR (101 MHz, DMSO- $D_6$ )  $\delta$  177.95, 148.66, 141.18, 135.62, 135.50, 132.87, 132.46, 131.20, 128.87, 126.85, 124.94, 123.06, 121.94, 118.14, 102.93, 102.65, 61.08, 52.83, 32.68, 29.54. **ESI HRMS:** calcd. For  $C_{21}H_{16}N_4O_3S[M+H]^+$  405.0943, found 405.0977.

#### 6a

$^1H$  NMR (400 MHz,  $CDCl_3$ )  $\delta$  7.89 (d,  $J = 7.8$  Hz, 1H), 7.78 – 7.73 (m, 1H), 7.72 – 7.65 (m, 2H), 7.44 – 7.39 (m, 2H), 7.34 (t,  $J = 6.7$  Hz, 3H), 5.87 (d,  $J = 4.6$  Hz, 1H), 4.50 (d,  $J = 4.6$  Hz, 1H). **ESI HRMS:** calcd. For  $C_{18}H_{13}N_3O_2S[M+H]^+$  336.0801 found 336.0798.

#### 6b

$^1H$  NMR (400 MHz,  $CDCl_3$ )  $\delta$  7.88 (d,  $J = 7.8$  Hz, 1H), 7.78 – 7.64 (m, 3H), 7.34 (td,  $J = 7.6, 1.8$  Hz, 2H), 7.24 – 7.18 (m, 1H), 7.16 – 7.07 (m, 1H), 5.88 (d,  $J = 4.7$  Hz, 1H), 4.89 (d,  $J = 4.7$  Hz, 1H).  $^{13}C$

NMR (101 MHz, DMSO- $D_6$ )  $\delta$  161.77, 159.32, 147.66, 135.32, 132.37, 131.95, 130.39, 130.26, 129.55, 128.66, 127.35, 125.56, 123.53, 122.86, 121.73, 121.41, 119.79, 116.67, 112.64, 105.19, 62.29, 32.65, 32.58. **ESI HRMS:** calcd. For  $C_{18}H_{12}N_3O_2SF[M+H]^+$ +354.0703 found 354.0701.

#### 6c

$^1H$  NMR (400 MHz,  $CDCl_3$ )  $\delta$  7.87 (d,  $J = 7.8$  Hz, 1H), 7.77 – 7.63 (m, 3H), 7.45 – 7.32 (m, 3H), 7.26 (td,  $J = 7.5, 1.8$  Hz, 1H), 5.91 (d,  $J = 4.7$  Hz, 1H), 5.07 (d,  $J = 4.7$  Hz, 1H). **ESI HRMS:** calcd. For  $C_{18}H_{12}N_3O_2S[M+H]^+$ +370.0412 and 372.0382, found 370.0411 and 372.0386.

#### 6d

$^1H$  NMR (400 MHz,  $CDCl_3$ )  $\delta$  7.87 (d,  $J = 7.8$  Hz, 1H), 7.74 – 7.63 (m, 3H), 7.28 (d,  $J = 5.9$  Hz, 2H), 7.02 (s, 1H), 6.95 (d,  $J = 8.2$  Hz, 1H), 5.90 (d,  $J = 4.9$  Hz, 1H), 4.94 (d,  $J = 4.8$  Hz, 1H), 3.92 (s, 3H).  $^{13}C$  NMR (101 MHz, DMSO- $D_6$ )  $\delta$  147.66, 146.98, 142.12, 141.11, 137.15, 135.26, 132.39, 129.95, 129.58, 128.12, 127.37, 126.37, 122.74, 121.70, 107.16, 73.81, 40.67, 40.46, 40.25, 40.04, 39.83, 39.62, 39.41, 32.70, 21.18, 14.61. **ESI HRMS:** calcd. For  $C_{19}H_{15}N_3O_3S[M+H]^+$  + 366.0801 found 366.0798.

#### 6e

$^1H$  NMR (400 MHz,  $CDCl_3$ )  $\delta$  7.90 (d,  $J = 7.8$  Hz, 1H), 7.80 – 7.75 (m, 1H), 7.74 – 7.67 (m, 2H), 7.40 – 7.35 (m, 1H), 7.13 (dt,  $J = 7.7, 1.3$  Hz, 1H), 7.07 – 6.99 (m, 2H), 5.84 (d,  $J = 4.5$  Hz, 1H), 4.51 (d,  $J = 4.5$  Hz, 1H).  $^{13}C$  NMR (101 MHz, )  $\delta$  161.59, 160.91, 146.35, 135.30, 131.33, 131.16, 130.85, 130.69, 130.55, 130.23, 130.14, 129.56, 127.41, 127.36, 125.93, 122.92, 121.73, 119.89, 116.16, 116.08, 106.73, 62.74, 32.68. **ESI HRMS:** calcd. For  $C_{18}H_{12}N_3O_2SF[M+H]^+$ +354.3714 found 354.3712.

#### 6f

$^1H$  NMR (400 MHz,  $CDCl_3$ )  $\delta$  7.90 (d,  $J = 7.8$  Hz, 1H), 7.80 – 7.75 (m, 1H), 7.71 (d,  $J = 8.4$  Hz, 2H), 7.34 (dd,  $J = 13.5, 5.8$  Hz, 2H), 7.26 – 7.21 (m, 1H), 5.81 (d,  $J = 4.5$  Hz, 1H), 4.49 (d,  $J = 4.5$  Hz, 1H). **ESI HRMS:** calcd. For  $C_{18}H_{12}N_3O_2S[M+H]^+$ +370.0412 and 372.0382, found 370.0411 and 372.0386.

#### 6g

$^1H$  NMR (400 MHz,  $CDCl_3$ )  $\delta$  7.90 (d,  $J = 7.9$  Hz, 1H), 7.80 – 7.67 (m, 3H), 7.31 (s, 1H), 7.29 – 7.27 (m, 1H), 7.09 (t,  $J = 8.4$  Hz, 2H), 5.83 (d,  $J = 4.5$  Hz, 1H), 4.49 (d,  $J = 4.6$  Hz, 1H).  $^{13}C$  NMR (101 MHz, DMSO- $D_6$ )  $\delta$  163.87, 160.97, 146.37, 141.77, 135.32, 131.92, 131.34, 131.03, 130.61, 127.37, 126.83, 122.93, 121.86, 119.84, 116.68, 115.55, 106.26, 63.50. **ESI HRMS:** calcd. For  $C_{18}H_{12}N_3O_2SF[M+H]^+$ +354.0634 found 354.0631.

#### 6h

$^1H$  NMR (400 MHz,  $CDCl_3$ )  $\delta$  7.90 (d,  $J = 7.9$  Hz, 1H), 7.76 (d,  $J = 7.0$  Hz, 1H), 7.71 (d,  $J = 8.0$  Hz, 2H), 7.38 (d,  $J = 8.2$  Hz, 2H), 7.27 (d,  $J = 8.2$  Hz, 2H), 5.82 (d,  $J = 4.5$  Hz, 1H), 4.49 (d,  $J = 4.5$  Hz, 1H). **ESI HRMS:** calcd. For  $C_{18}H_{12}N_3O_2S[M+H]^+$ +370.0412 and 372.0382, found 370.0411 and 372.0386.

#### 6i

$^1H$  NMR (400 MHz,  $CDCl_3$ )  $\delta$  7.90 (d,  $J = 8.0$  Hz, 1H), 7.76 (d,  $J = 7.0$  Hz, 1H), 7.70 (d,  $J = 7.7$  Hz, 2H), 7.56 – 7.52 (m, 2H), 7.21 (d,  $J = 8.3$  Hz, 2H), 5.81 (d,  $J = 4.5$  Hz, 1H), 4.47 (d,  $J = 4.5$  Hz, 1H). **ESI HRMS:** calcd. For  $C_{18}H_{12}N_3O_2SBr[M+H]^+$ +413.9906 and 415.9886, found 413.9904 and 415.9883.

#### 6j

$^1H$  NMR (400 MHz,  $CDCl_3$ )  $\delta$  7.91 (d,  $J = 8.0$  Hz, 1H), 7.78 (d,  $J = 7.5$  Hz, 1H), 7.72 (dd,  $J = 7.6, 4.0$  Hz, 4H), 7.46 (d,  $J = 8.0$  Hz, 2H), 5.80 (d,  $J = 4.6$  Hz, 1H), 4.58 (d,  $J = 4.5$  Hz, 1H). **ESI HRMS:** calcd. For  $C_{19}H_{12}N_4O_2S[M+H]^+$  + 360.3910 found 360.3907.

#### 6k

$^1H$  NMR (400 MHz, DMSO)  $\delta$  8.06 (d,  $J = 7.9$  Hz, 1H), 7.99 (d,  $J = 8.0$  Hz, 1H), 7.79 (dt,  $J = 35.6, 7.6$  Hz, 2H), 7.17 (s, 1H), 7.13 (s, 1H), 6.16 (d,  $J = 5.2$  Hz, 3H), 4.43 (d,  $J = 4.7$  Hz, 1H).  $^{13}C$  NMR (101

MHz, DMSO- $D_6$ )  $\delta$  157.15, 147.92, 135.14, 132.39, 131.65, 131.09, 129.25, 128.66, 127.51, 126.88, 122.71, 121.63, 120.11, 112.02, 106.24, 73.83, 35.10, 32.70, 14.60. **ESI HRMS:** calcd. For  $C_{19}H_{15}N_3O_2S[M+H]^+$  350.0695 found 350.0692.

#### **6l**

$^1H$  NMR (400 MHz,  $CDCl_3$ )  $\delta$  7.90 (d,  $J = 7.8$  Hz, 1H), 7.80 – 7.66 (m, 3H), 6.93 – 6.85 (m, 2H), 6.82 (d,  $J = 1.8$  Hz, 1H), 5.86 (d,  $J = 4.5$  Hz, 1H), 4.45 (d,  $J = 4.5$  Hz, 1H), 3.91 (d,  $J = 1.9$  Hz, 6H).  $^{13}C$  NMR (101 MHz, DMSO- $D_6$ )  $\delta$  149.45, 148.71, 146.96, 136.57, 135.27, 131.76, 131.38, 127.59, 126.19, 122.76, 121.72, 120.25, 112.80, 111.95, 107.43, 67.56, 56.05, 32.68, 25.66. **ESI HRMS:** calcd. For  $C_{20}H_{17}N_3O_4S[M+H]^+$  396.4330 found 396.4327.

#### **6m**

$^1H$  NMR (400 MHz,  $CDCl_3$ )  $\delta$  7.89 (d,  $J = 7.8$  Hz, 1H), 7.80 – 7.66 (m, 3H), 7.31 (d,  $J = 1.5$  Hz, 1H), 7.07 – 7.01 (m, 2H), 5.93 (d,  $J = 4.6$  Hz, 1H), 4.83 (d,  $J = 4.5$  Hz, 1H).  $^{13}C$  NMR (101 MHz, DMSO- $D_6$ )  $\delta$  148.81, 146.86, 142.11, 141.00, 135.40, 132.00, 131.34, 127.37, 127.29, 126.47, 126.37, 125.20, 122.89, 121.86, 119.83, 106.28, 64.42, 35.75. **ESI HRMS:** calcd. For  $C_{16}H_{11}N_3O_2S_2[M+H]^+$  342.0293 found 342.0291.

#### **6n**

$^1H$  NMR (400 MHz,  $CDCl_3$ )  $\delta$  7.88 (ddd,  $J = 13.3, 6.6, 2.7$  Hz, 3H), 7.78 – 7.72 (m, 2H), 7.71 – 7.65 (m, 2H), 7.56 – 7.49 (m, 2H), 7.48 – 7.39 (m, 2H), 5.91 (d,  $J = 4.6$  Hz, 1H), 4.67 (d,  $J = 4.5$  Hz, 1H).  $^{13}C$  NMR (101 MHz, DMSO- $D_6$ )  $\delta$  147.65, 142.10, 135.30, 132.91, 132.42, 131.90, 129.58, 129.30, 128.68, 128.29, 128.14, 127.40, 127.03, 126.63, 126.48, 125.97, 122.84, 121.75, 120.05, 106.78, 60.32. **ESI HRMS:** calcd. For  $C_{22}H_{15}N_3O_2S[M+H]^+$  386.0885 found 386.0882.

## **Spectra of Products**

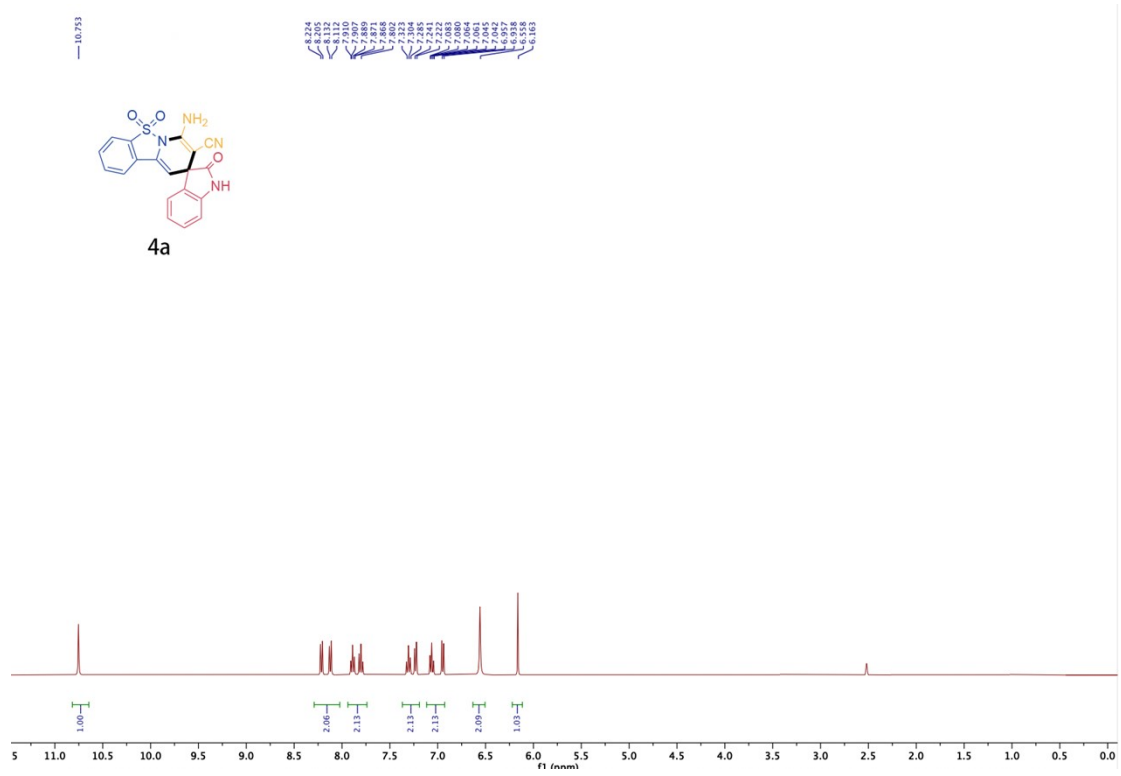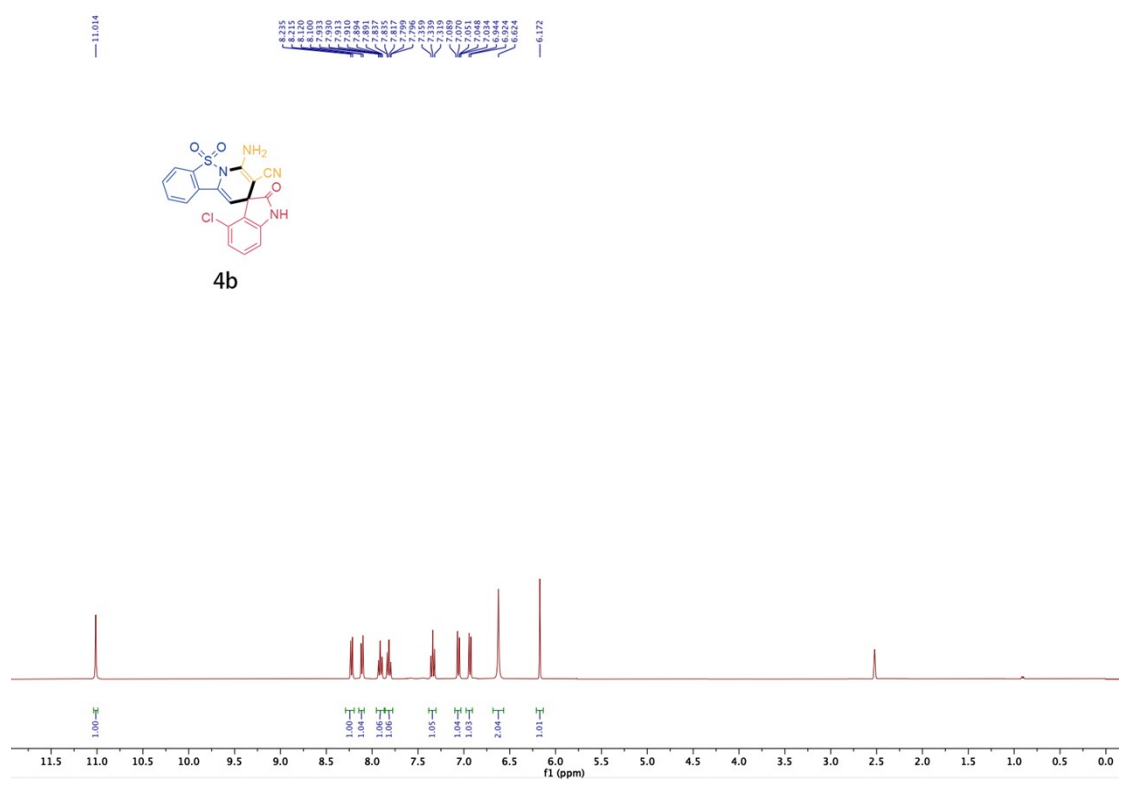

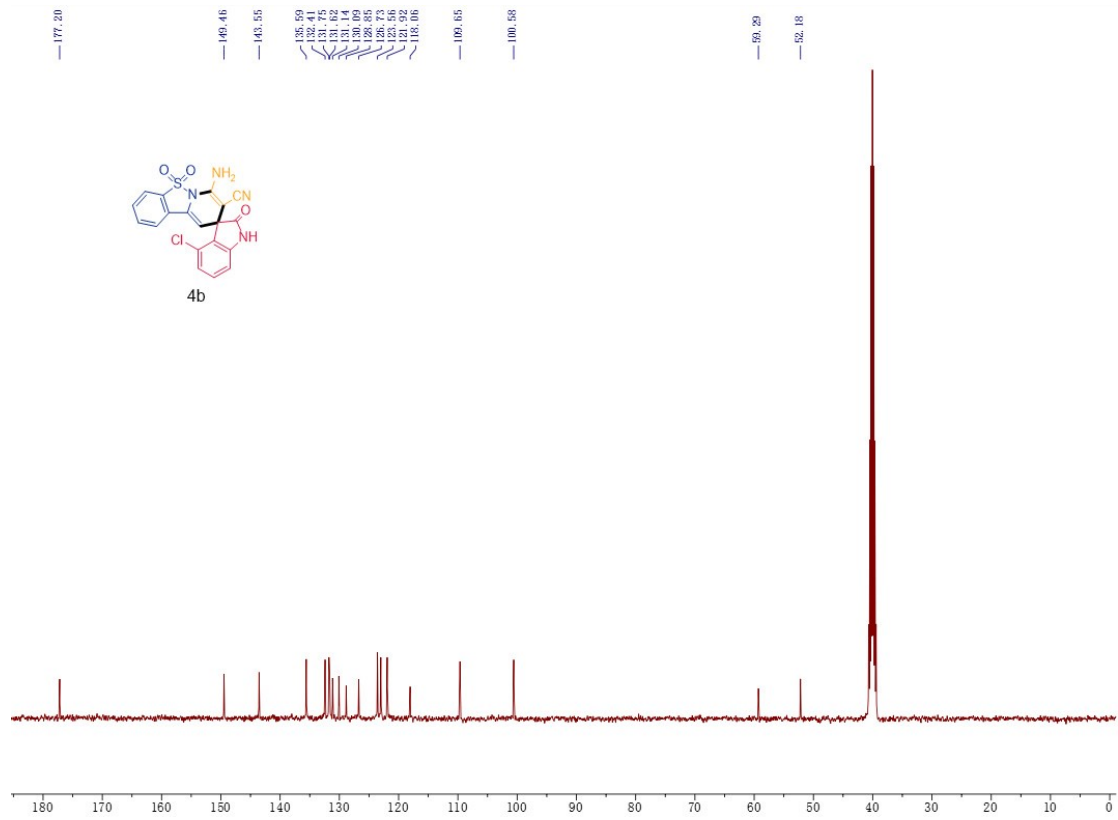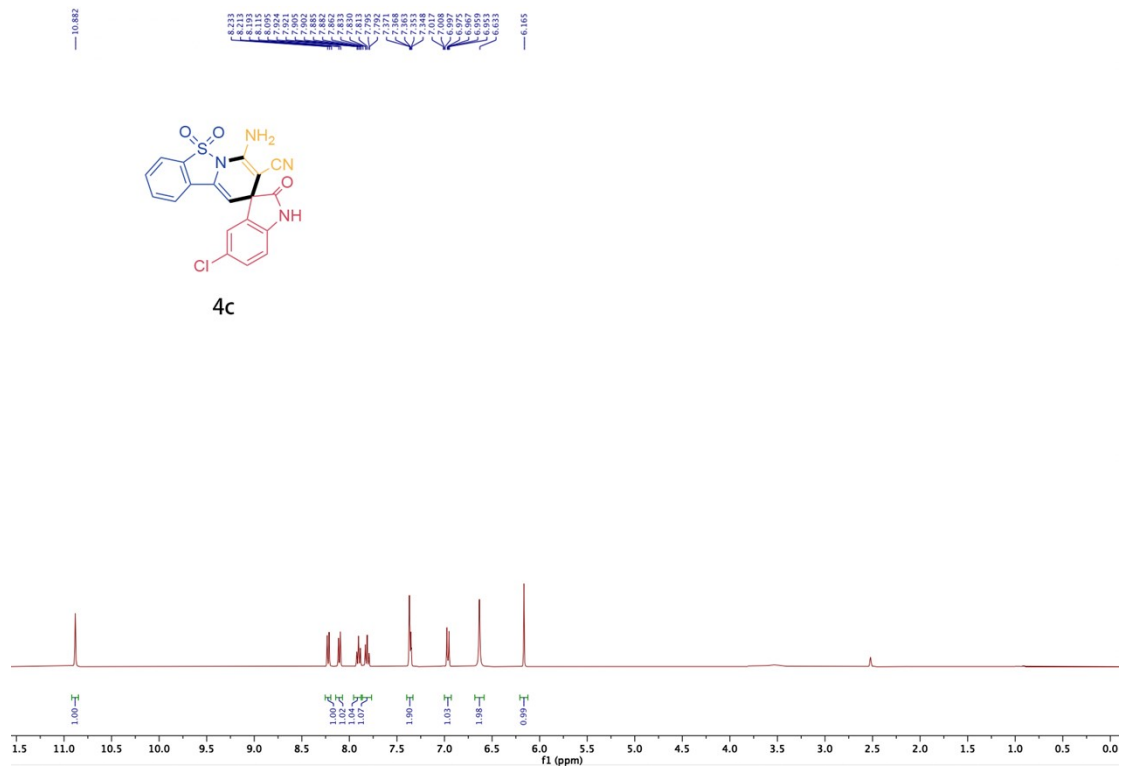

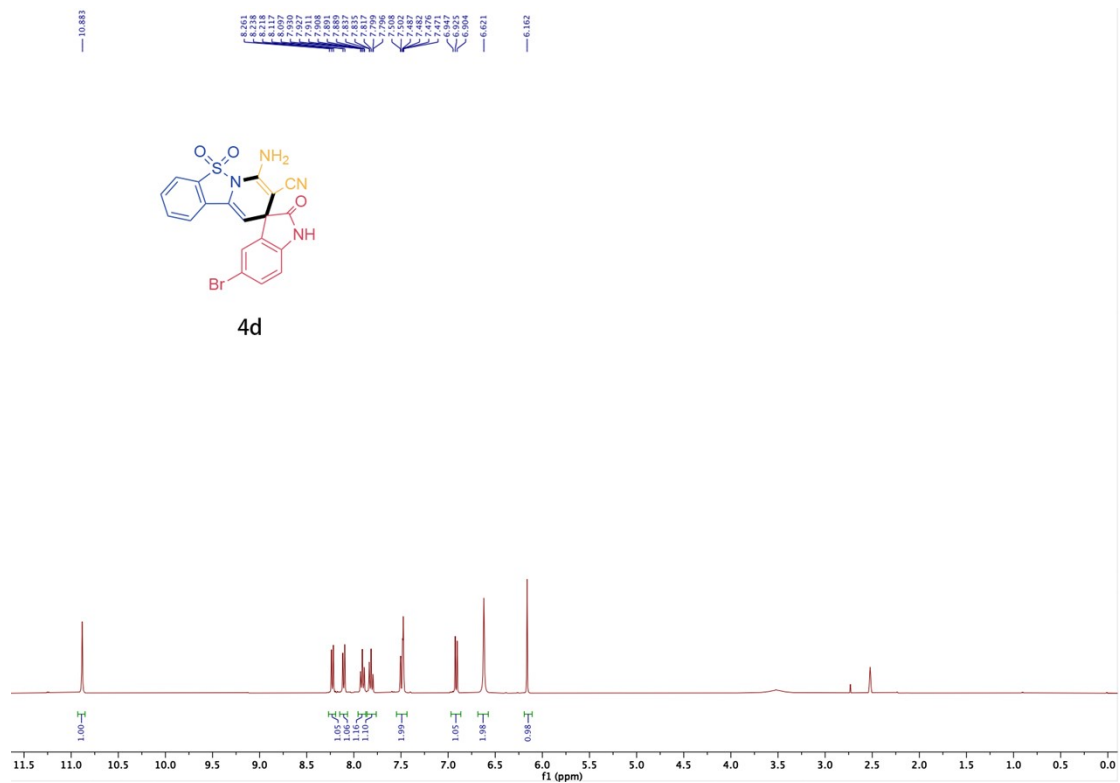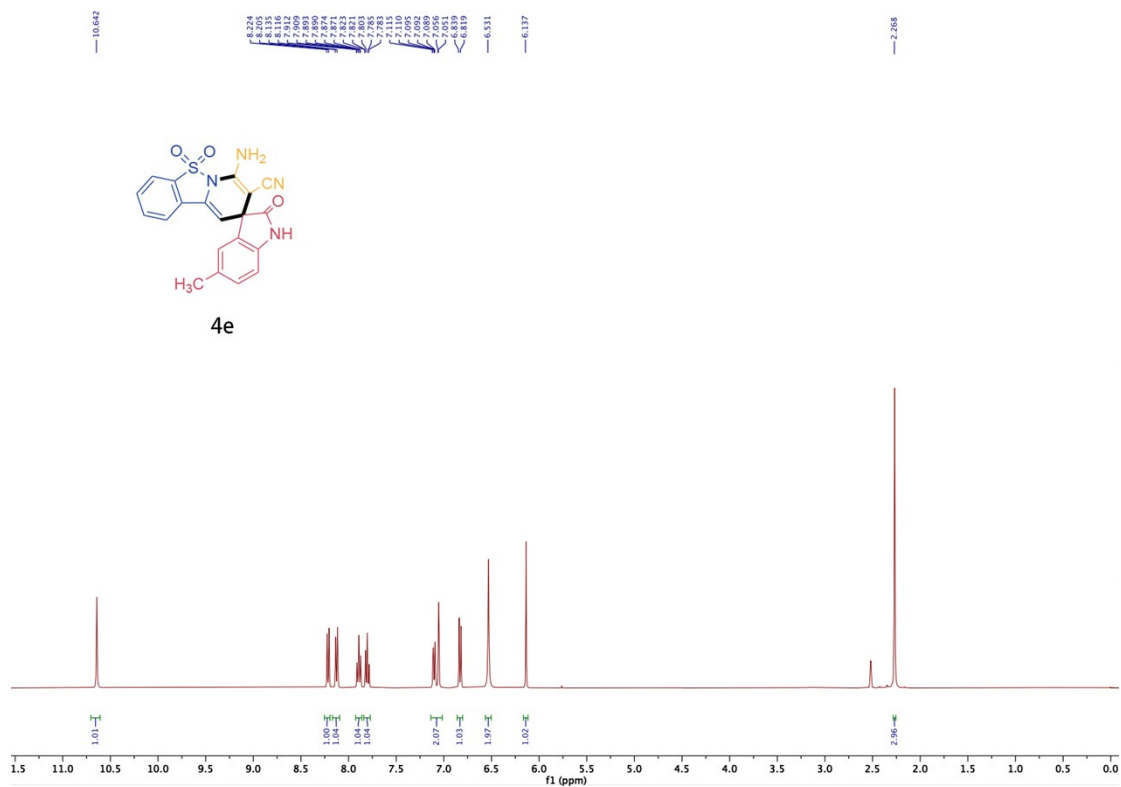





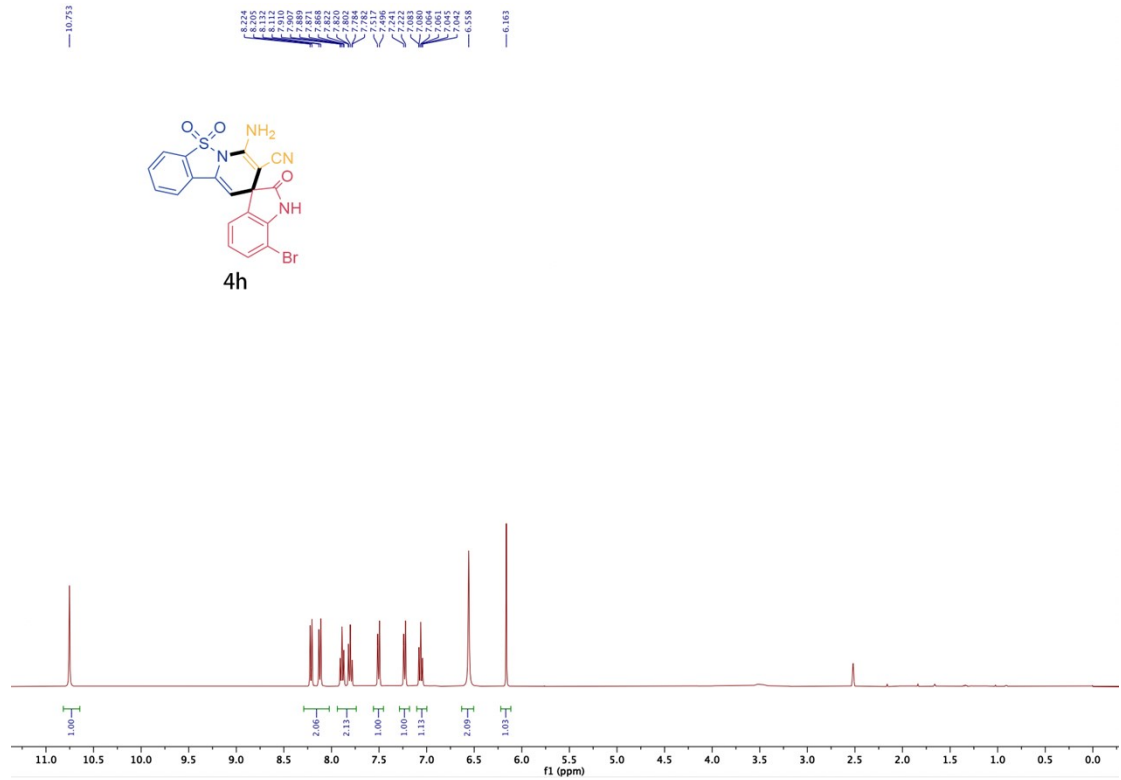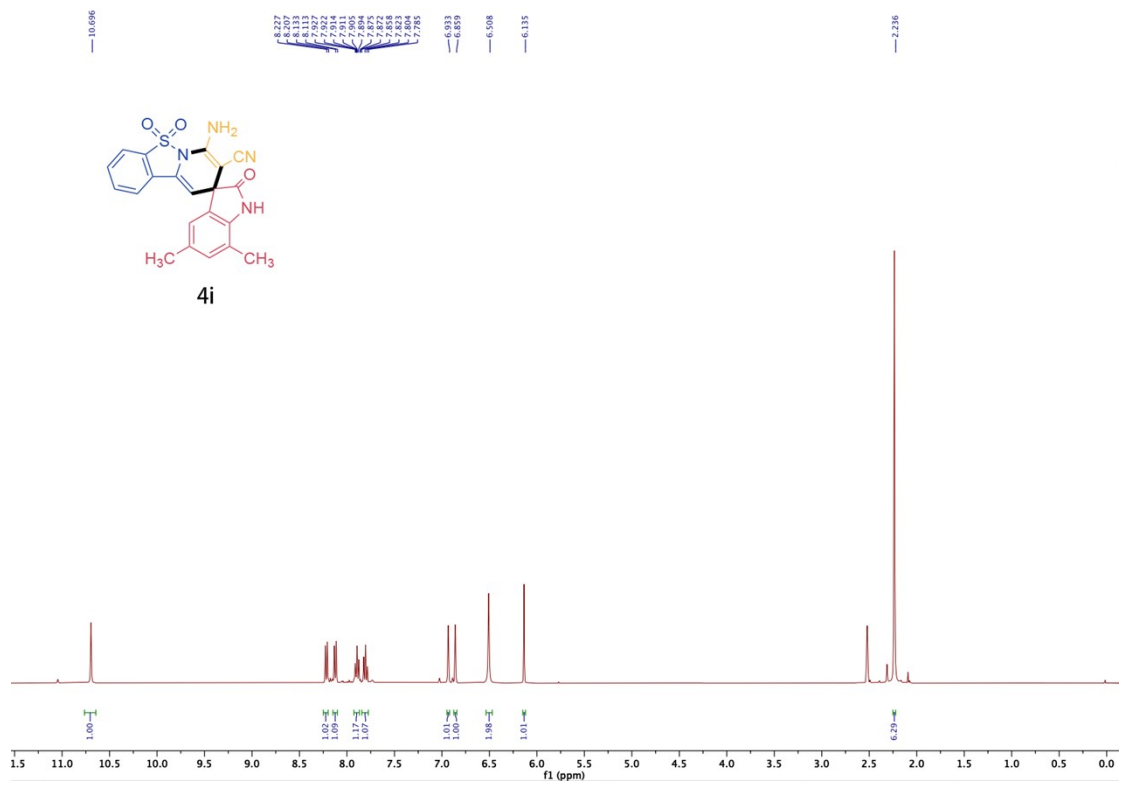

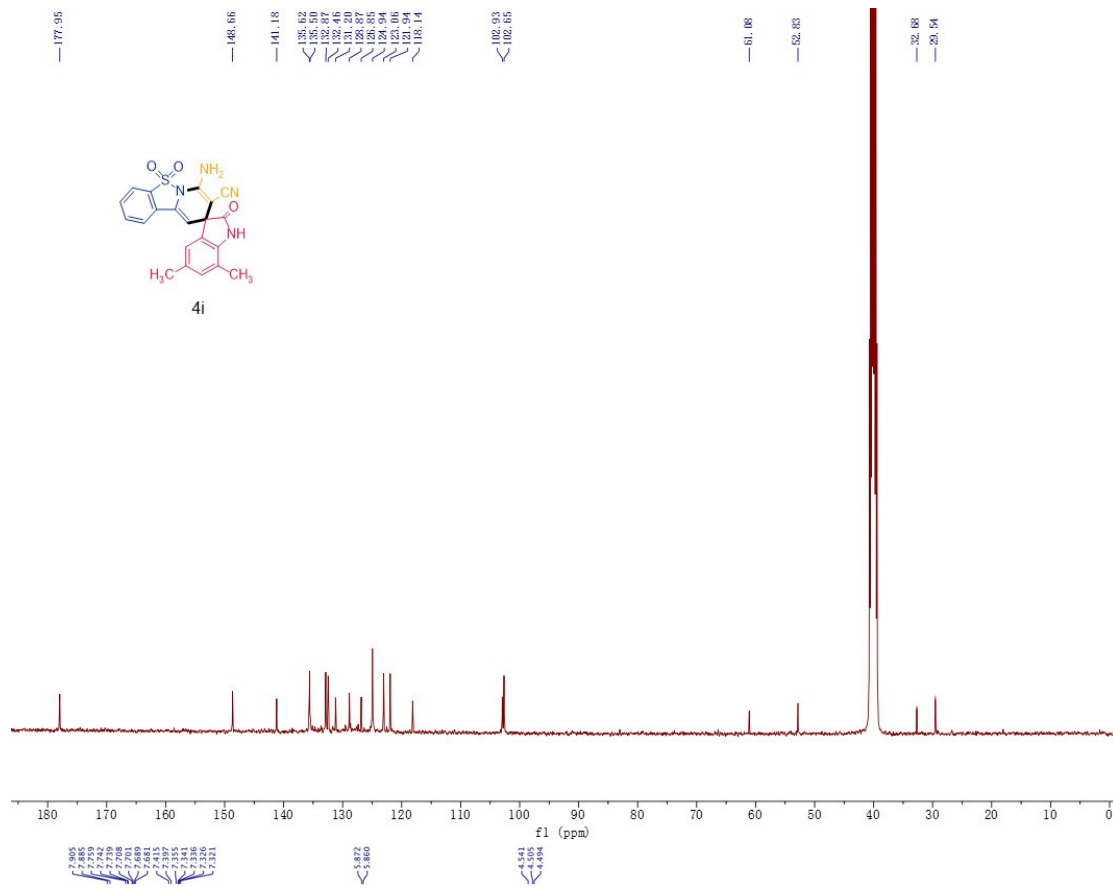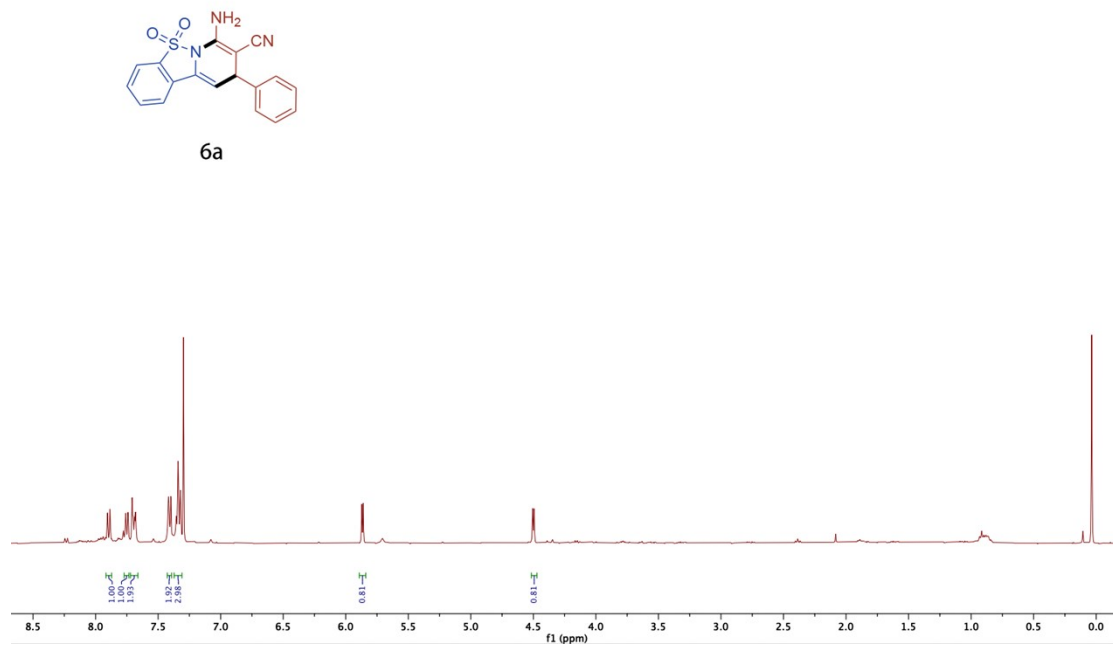

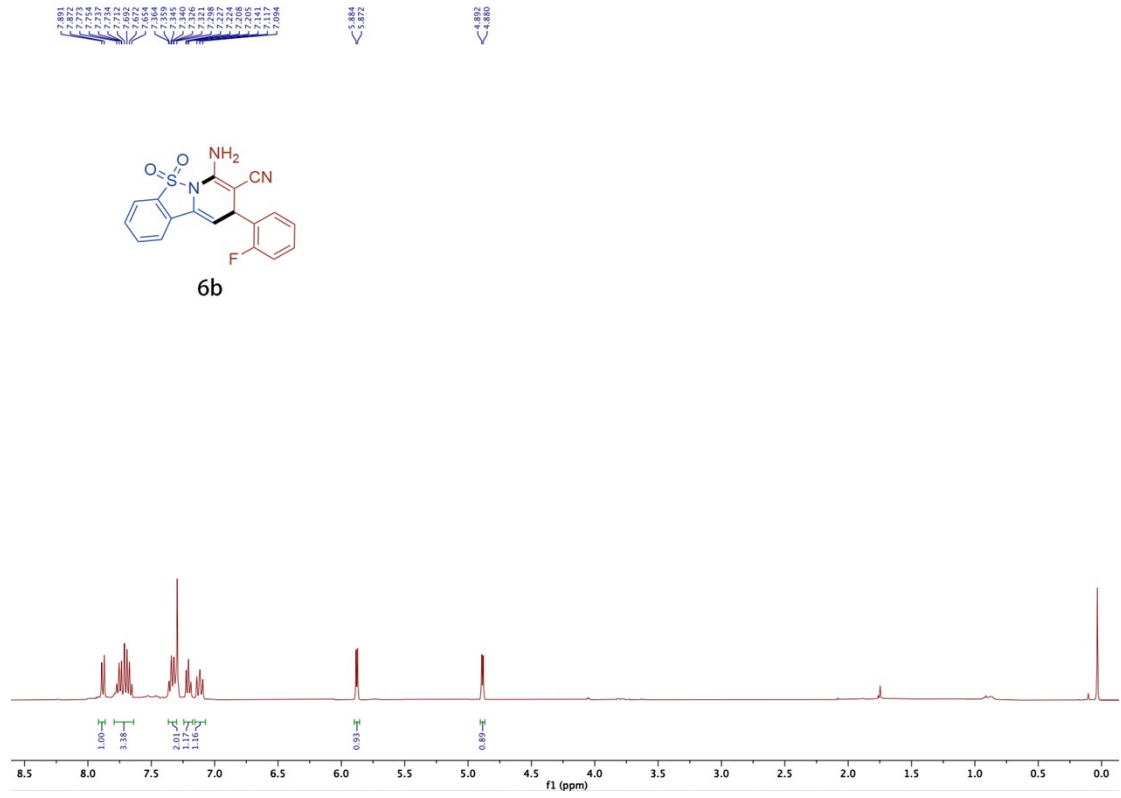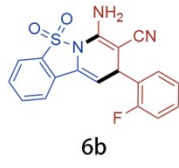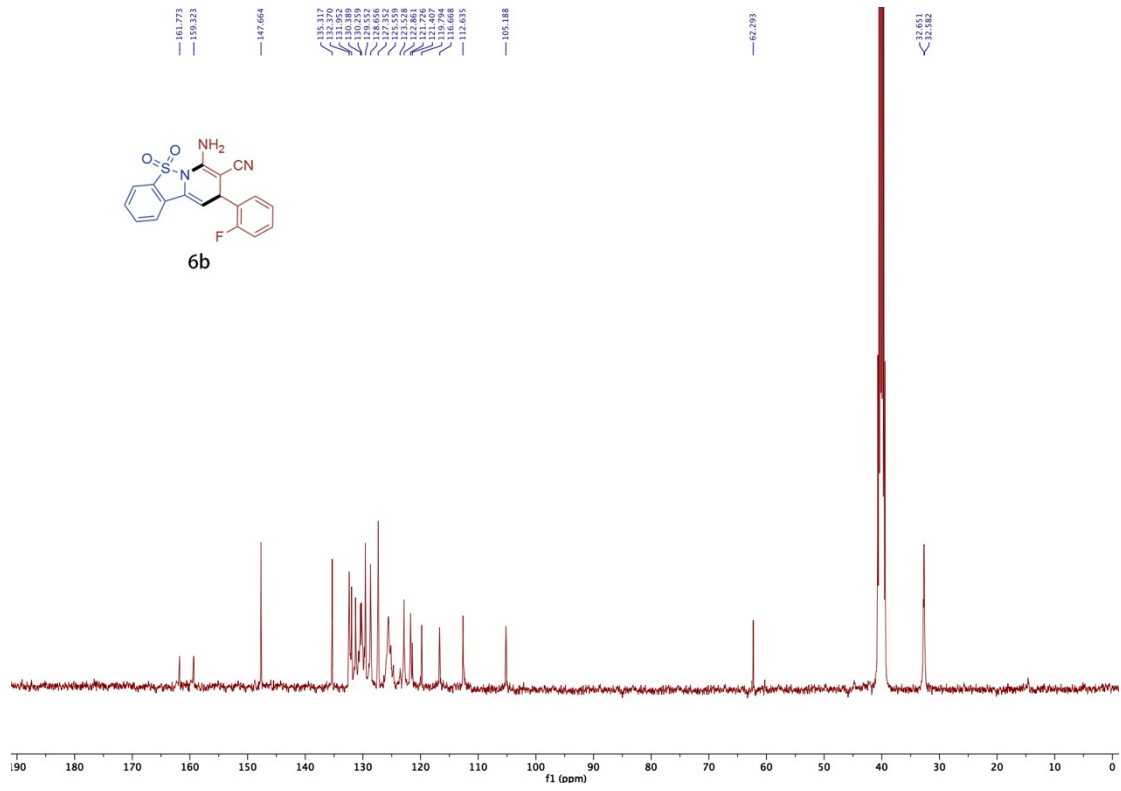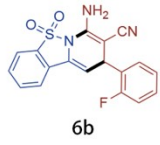

7.883  
7.879  
7.774  
7.763  
7.727  
7.727  
7.710  
7.706  
7.683  
7.679  
7.646  
7.440  
7.437  
7.417  
7.403  
7.403  
7.388  
7.362  
7.344  
7.334  
7.283  
7.283  
7.295

5.908

5.080

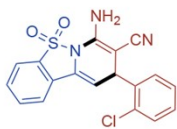

6c

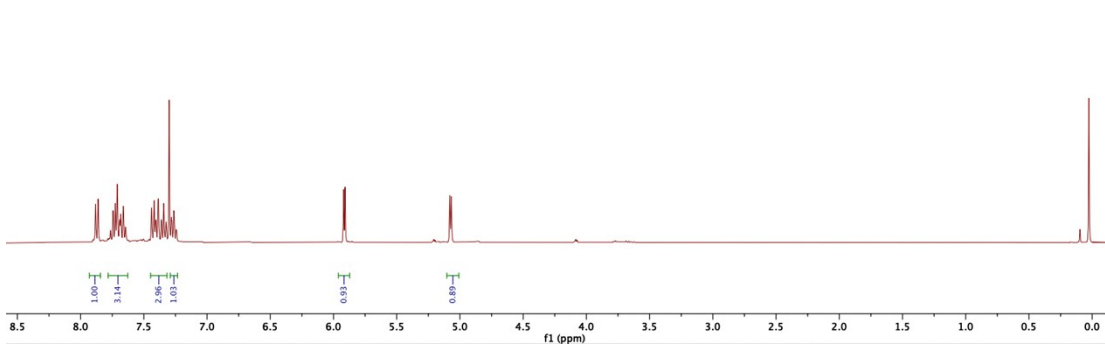

7.878  
7.859  
7.859  
7.776  
7.776  
7.711  
7.692  
7.663  
7.645  
7.635  
7.298  
7.282  
7.282  
7.019  
7.000  
6.999  
6.939

5.915

5.898

4.946

4.934

3.916

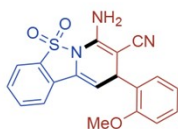

6d

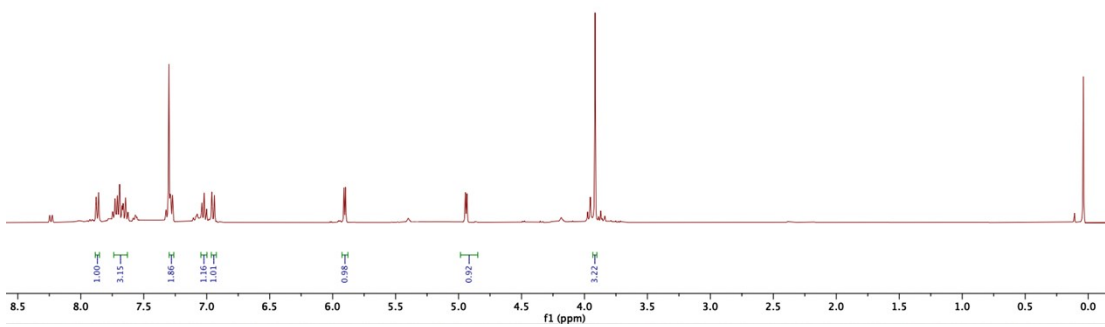

7.878

7.859

7.776

7.776

7.711

7.692

7.663

7.645

7.635

7.298

7.282

7.282

7.019

7.000

6.999

6.939

5.915

5.898

4.946

4.934

3.916

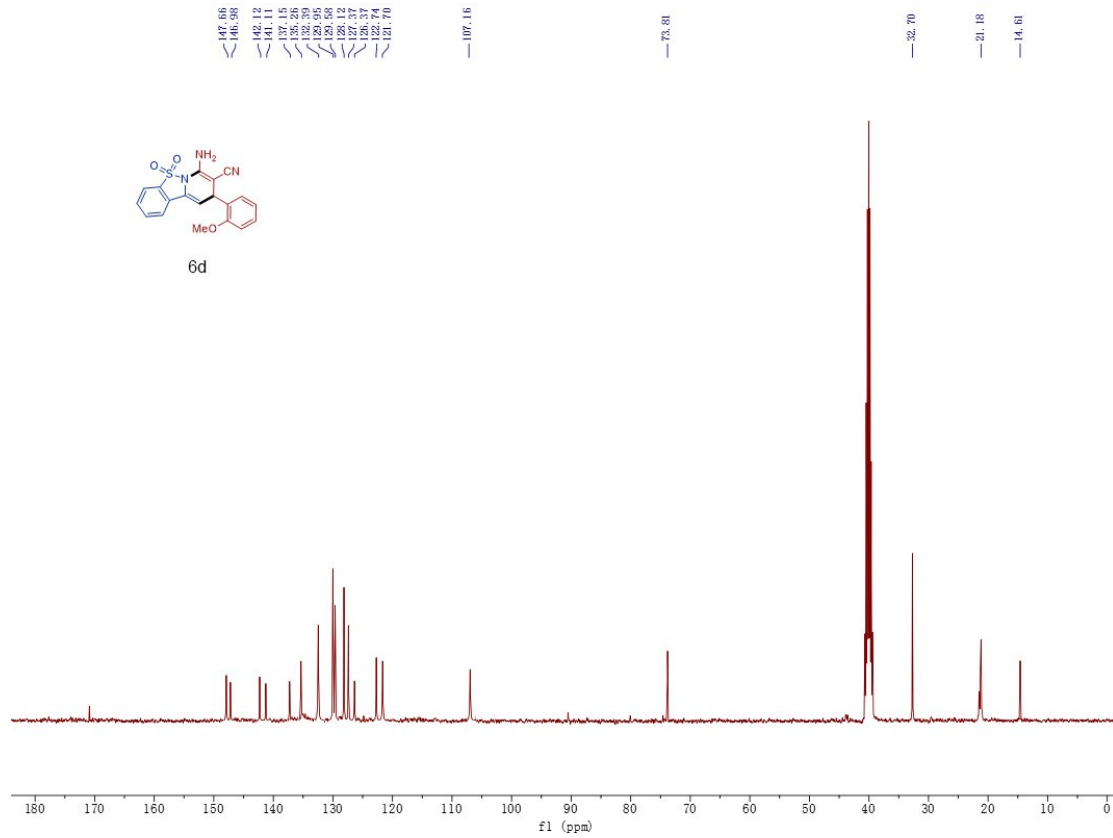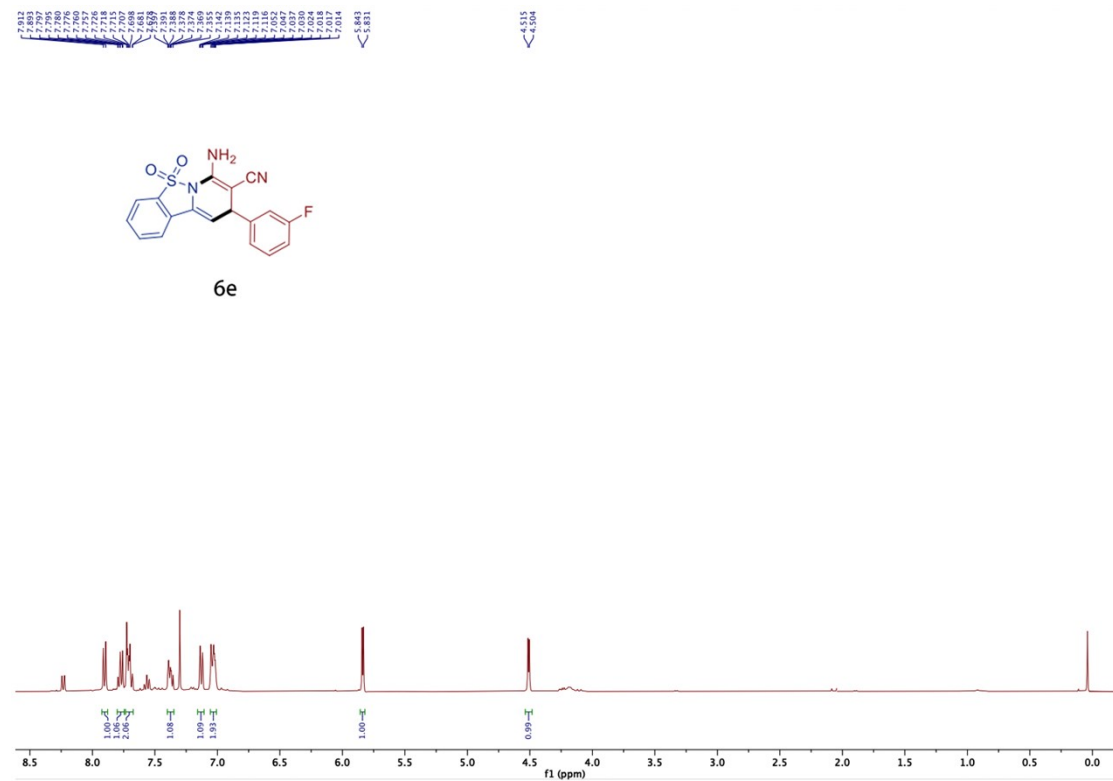

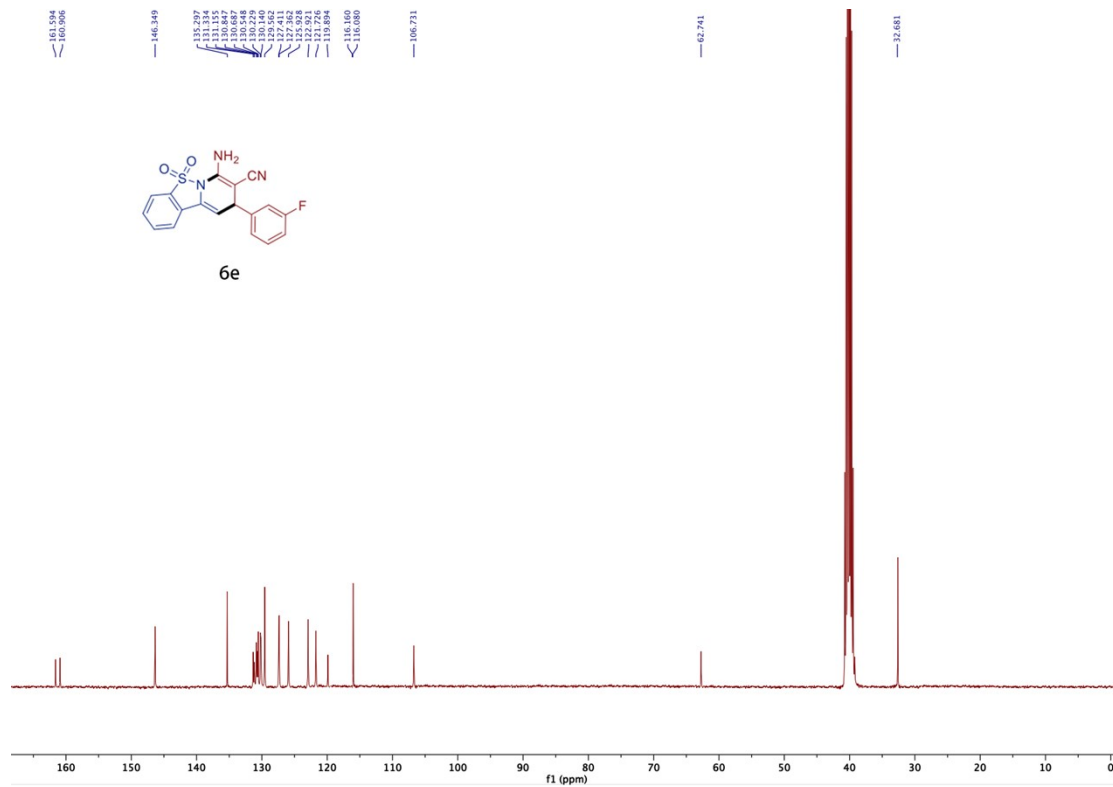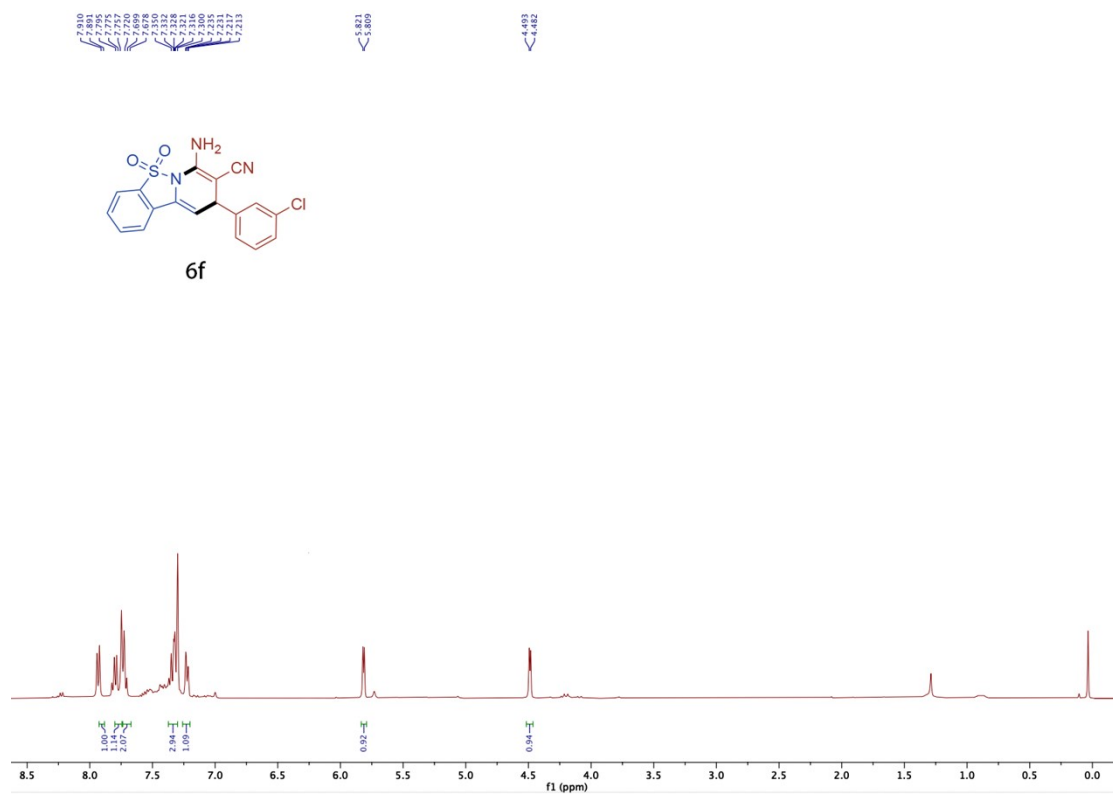

7.942  
7.938  
7.788  
7.750  
7.750  
7.710  
7.692  
7.512  
7.294  
7.297  
7.114  
7.072

5.832  
5.821

4.900  
4.890

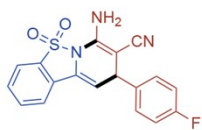

6g

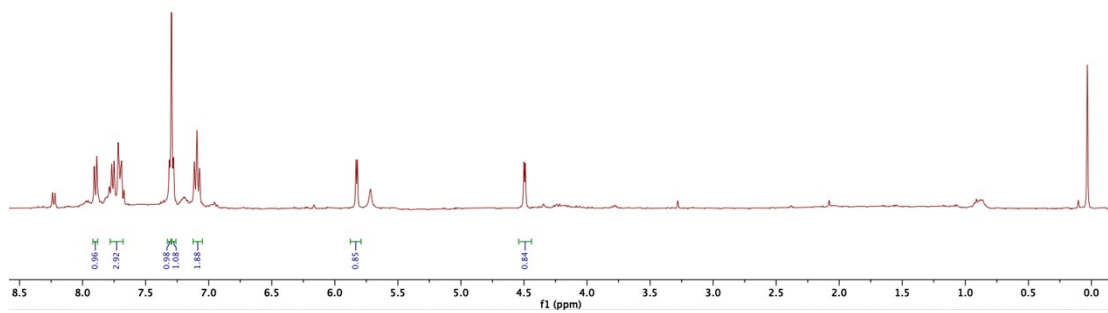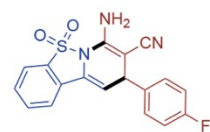

6g

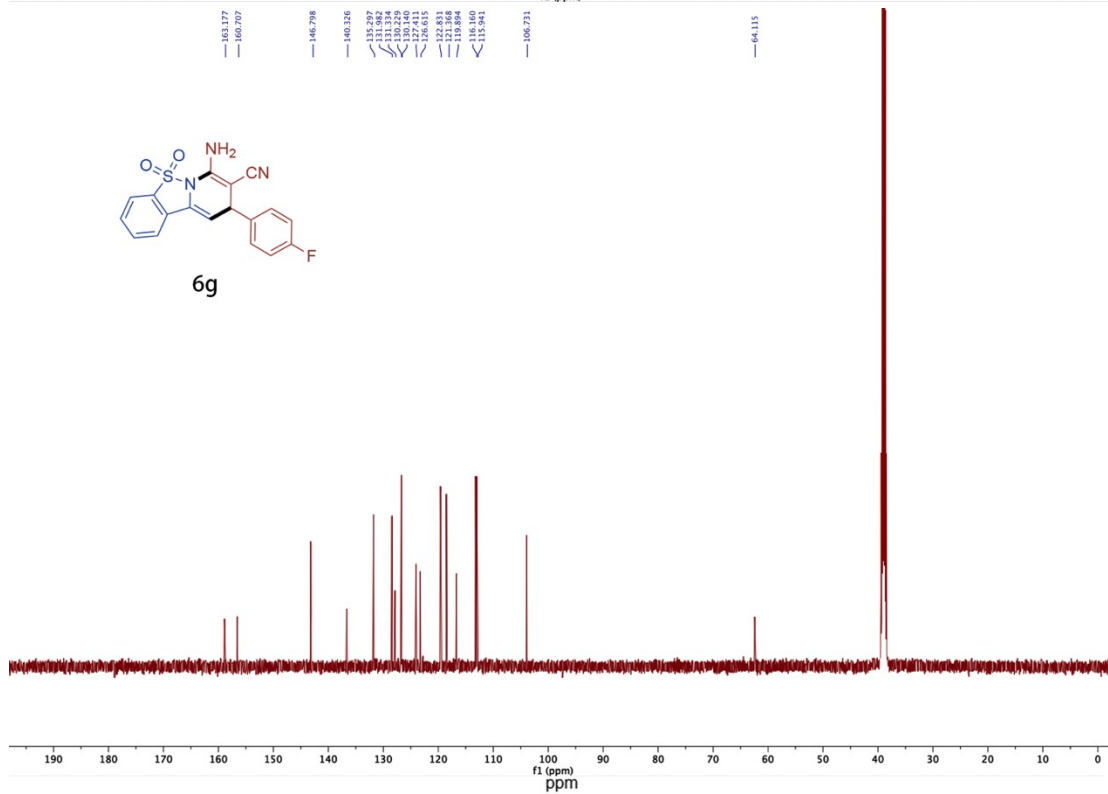



7.910  
7.896  
7.773  
7.773  
7.717  
7.697  
7.399  
7.387  
7.372  
7.216

5.810  
5.810

4.484  
4.483

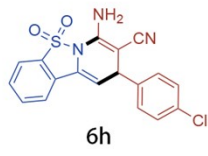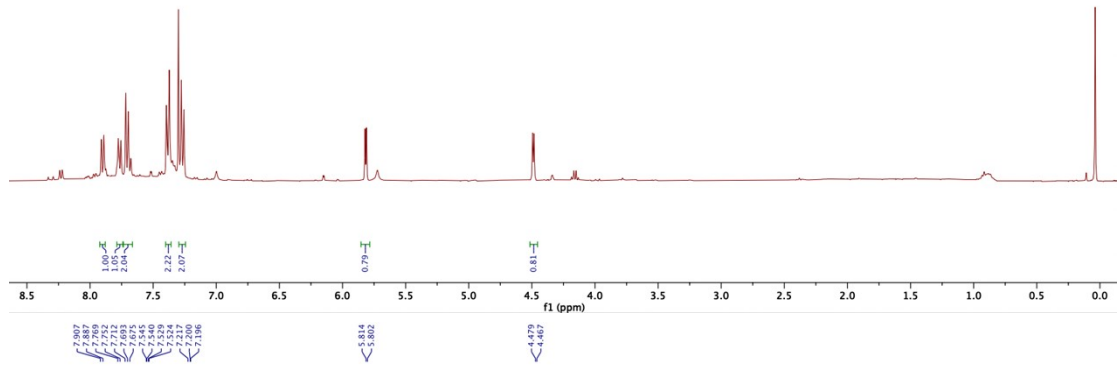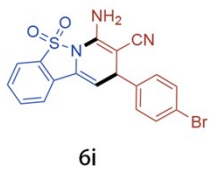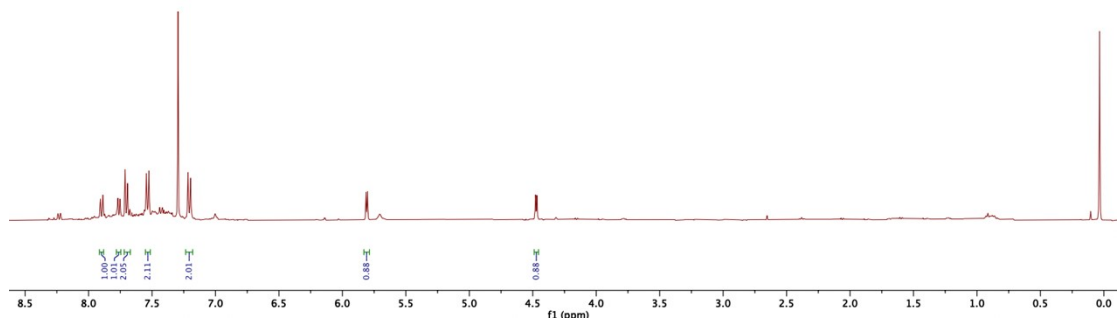

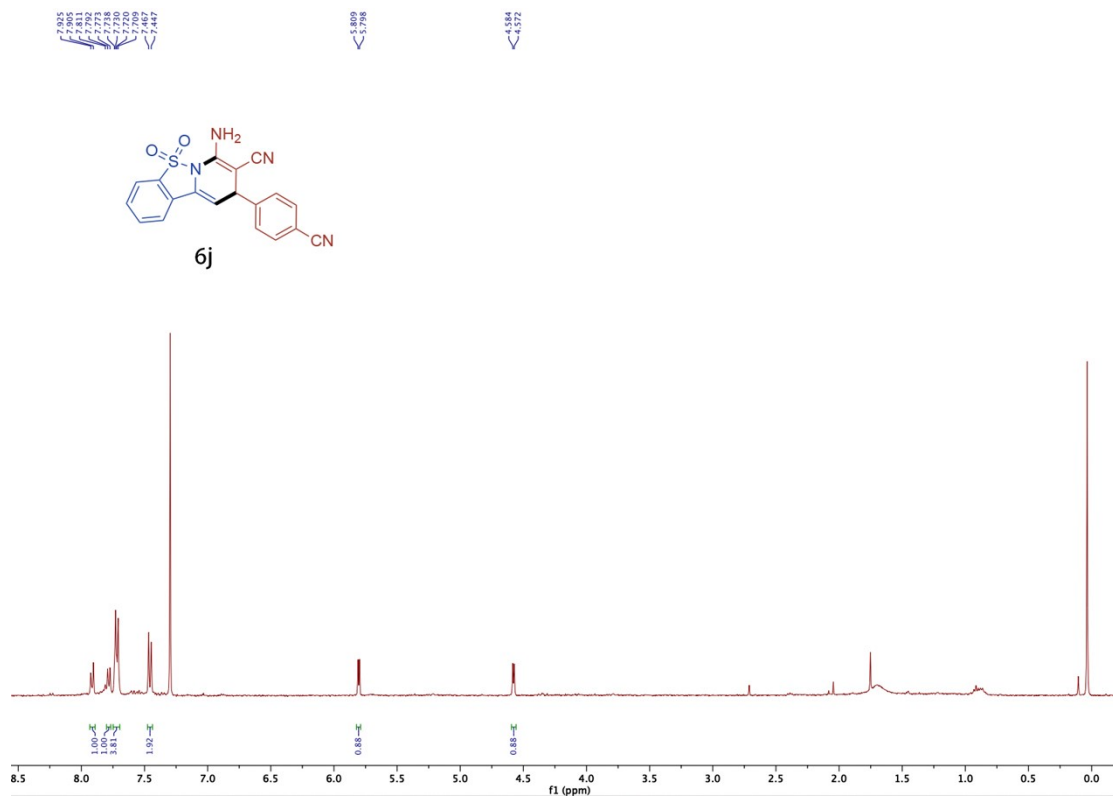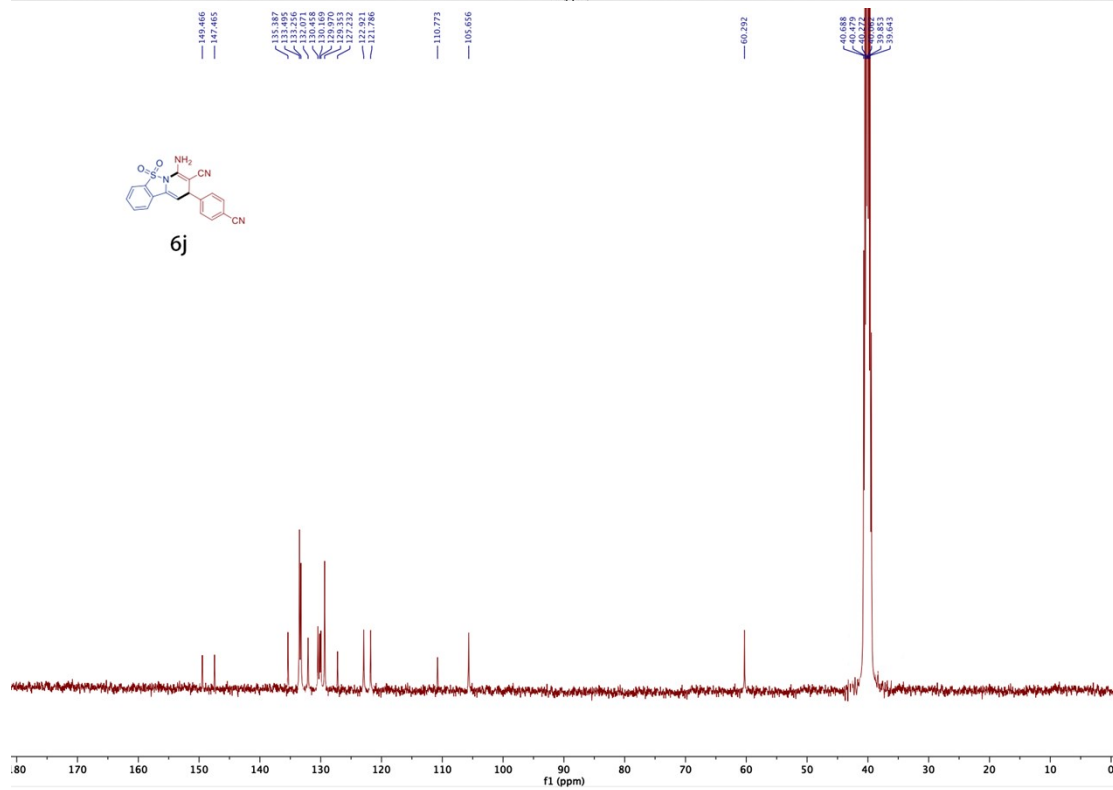

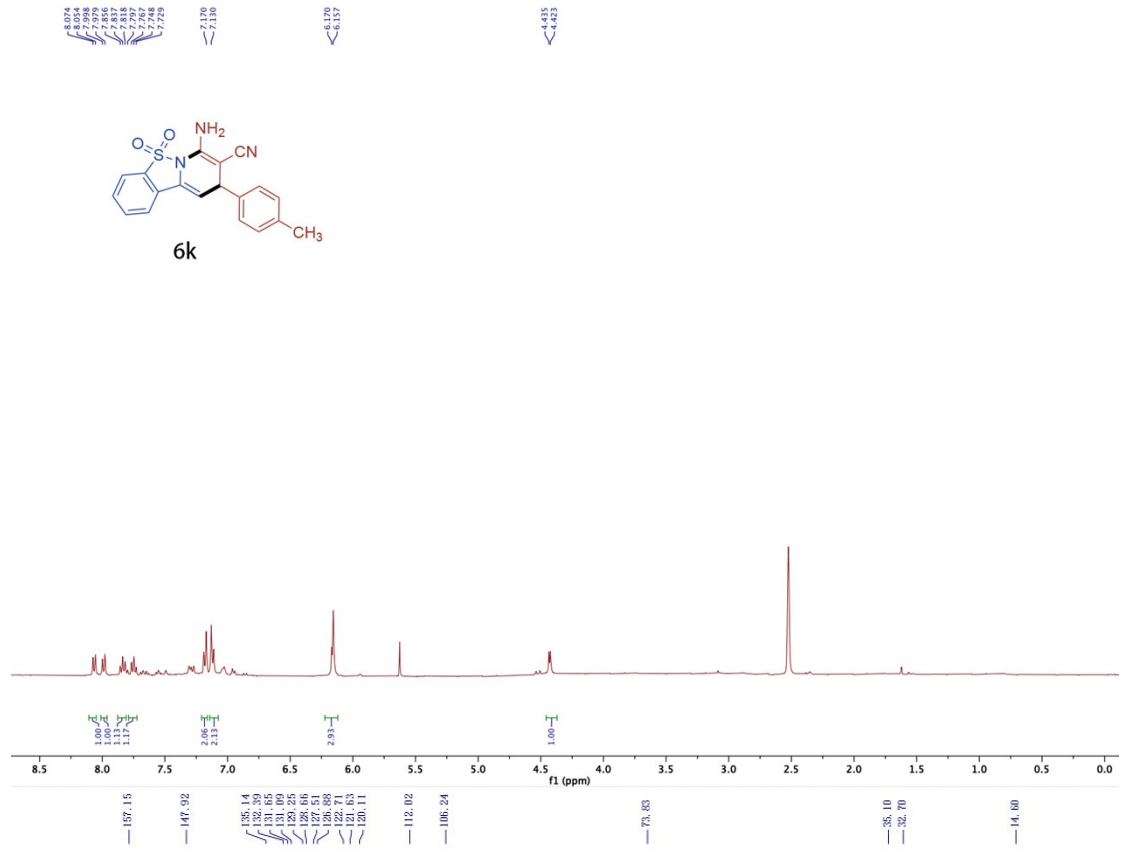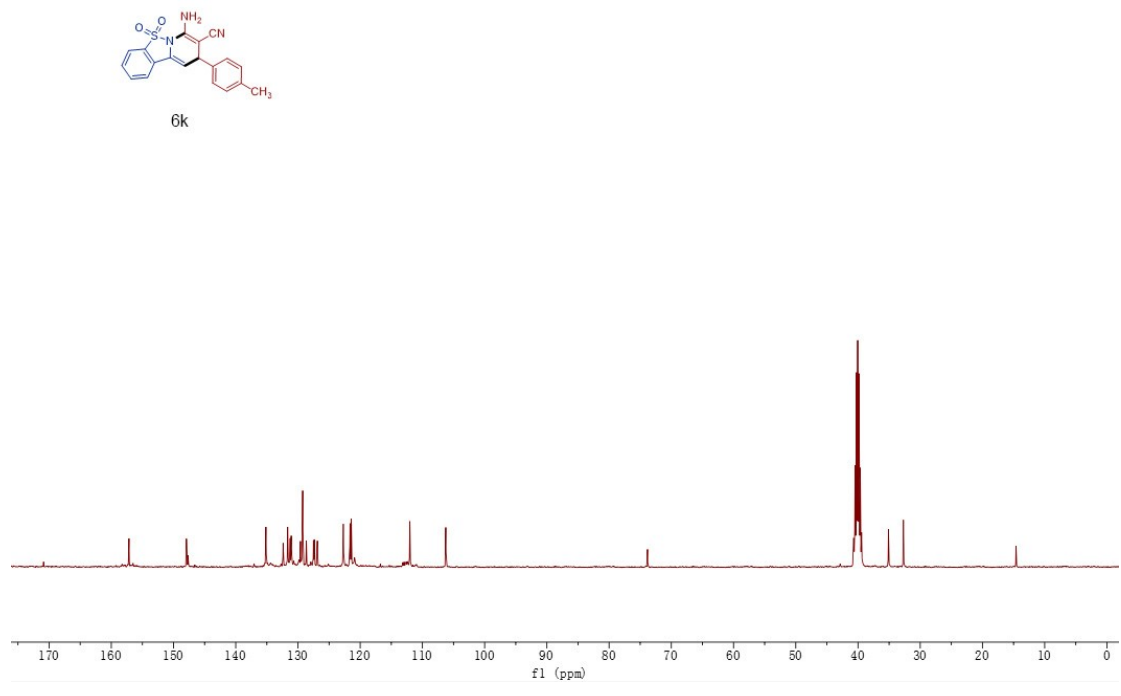

7.7088  
7.7085  
7.7082  
7.7079  
7.7109  
7.6855  
7.6852

6.9312  
6.8833  
6.8799  
6.8209

5.8888  
5.8855

4.442

3.9313

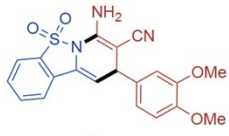

6l

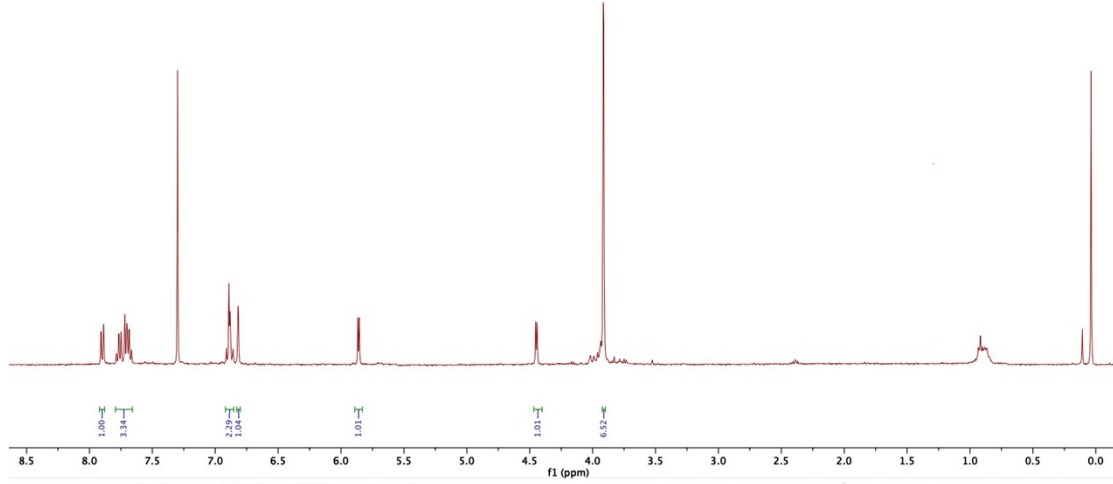

149.45  
148.06  
136.57  
135.27  
131.58  
131.58  
127.59  
126.76  
121.72  
120.25  
112.68  
111.96  
107.43  
67.56  
58.06  
32.08  
25.06

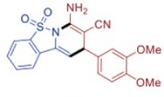

6l

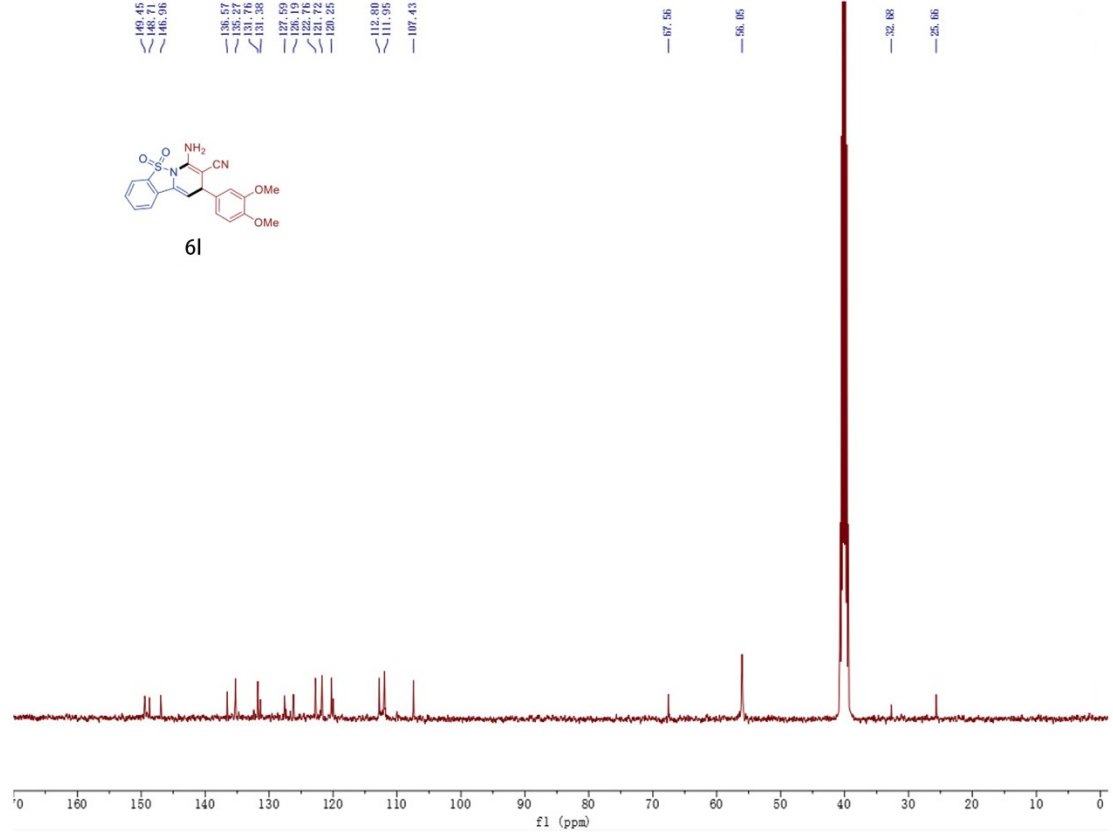

7.869  
7.880  
7.891  
7.977  
7.774  
7.757  
7.732  
7.710  
7.690  
7.309  
7.088  
7.040  
7.032  
7.020  
7.011

5.933  
5.921

4.832  
4.821

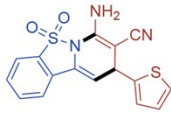

6m

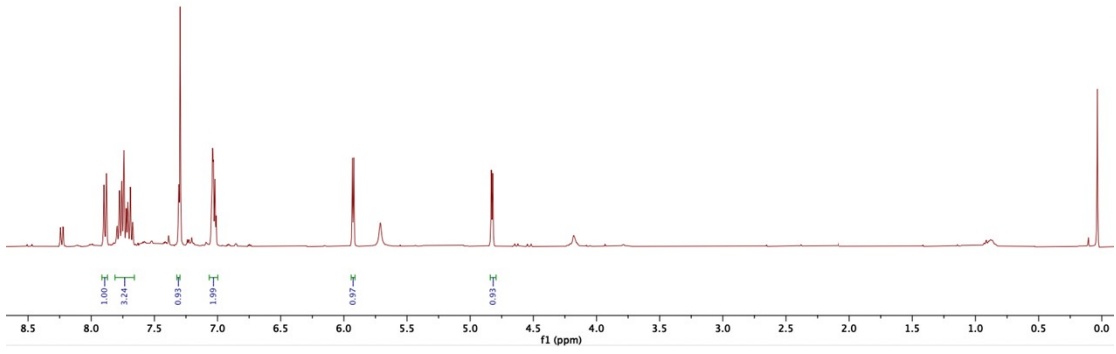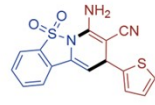

6m

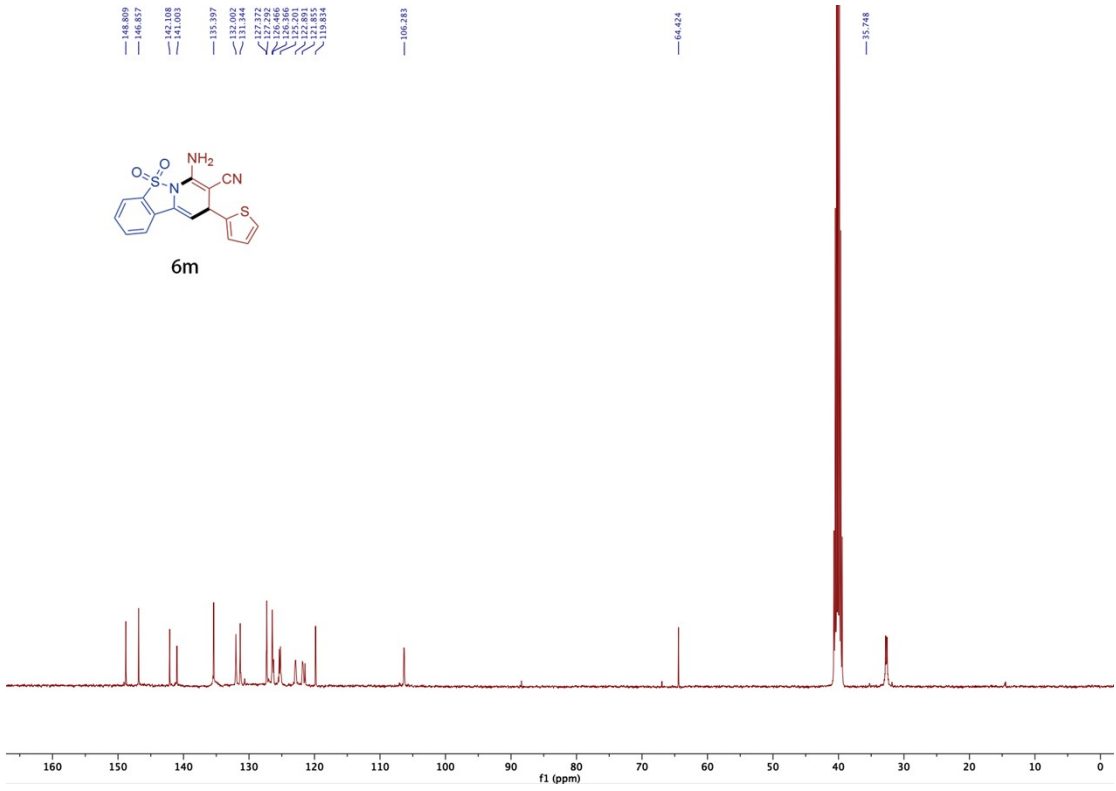

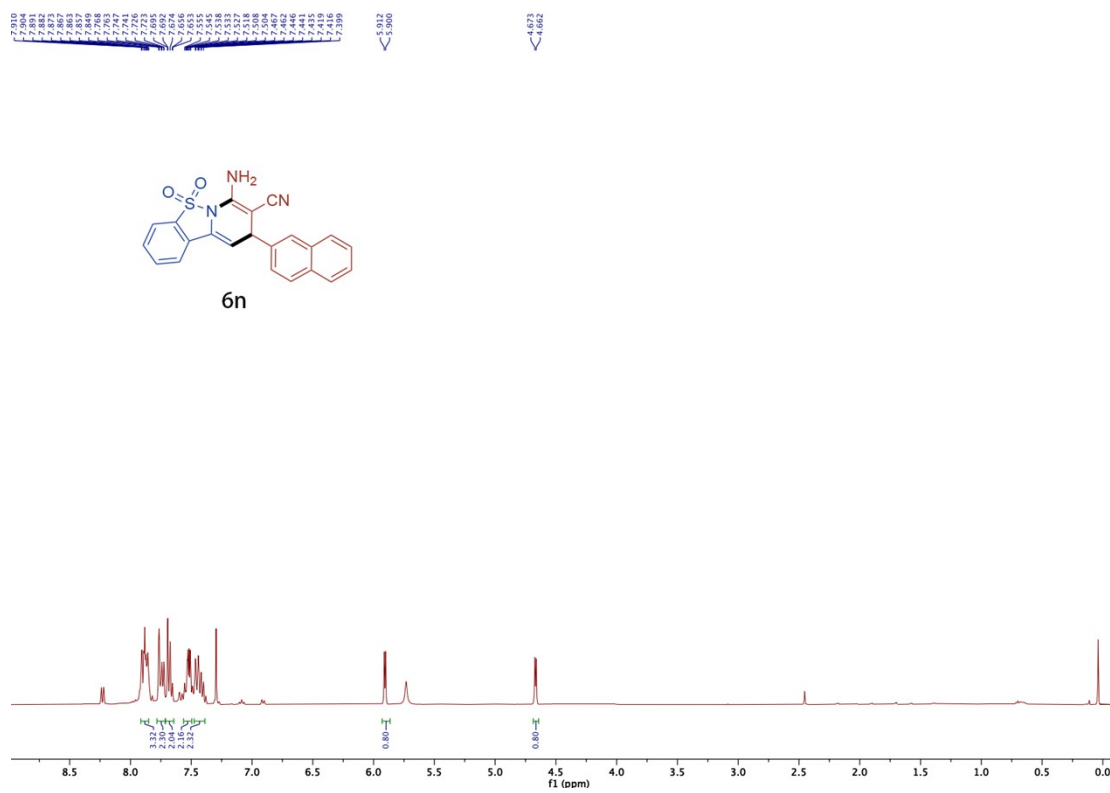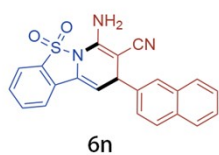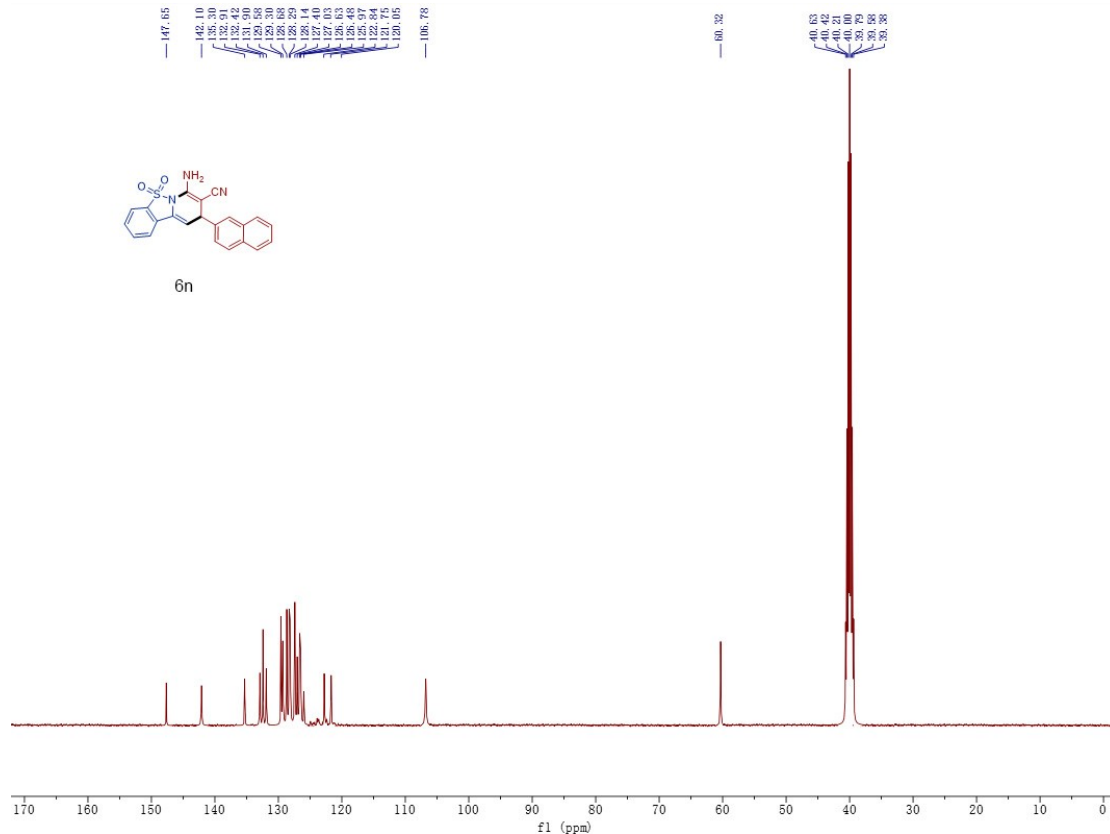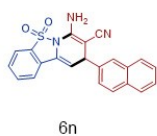

1. Xu, Z.-H.; Jia, S.-K.; Chang, Z.-R.; Hua, Y.-Z.; Wang, M.-C.; Mei, G.-J., Facile Access to Saccharin-Fused 1,4-Dihydropyridines through [3+3] Annulation Reactions. *Eur. J. Org. Chem.* **2022**, 2022 (7), e202101423.
